# Supplementary material
Source: PubMed Central journal article supplement (PMC4979977)
Supplement: NIHMS721123-supplement-307336DR1_Acknowledgment_Permissions.pdf [file NIHMS721123-supplement-307336DR1_Acknowledgment_Permissions.pdf]

## Circulation Research

---

**From:** gsaxena888@gmail.com on behalf of Gautam Saxena <gsaxena@i-a-inc.com>  
**Sent:** Tuesday, September 01, 2015 8:59 AM  
**To:** circulation.research@circresearch.com  
**Subject:** Fwd: Could you please send an email to below address ASAP?  
**Attachments:** FINAL\_Manuscript.pdf; 307336D\_Decision\_1440595706\_1.pdf

Hi,

Per the email below, I give full permission for my name (Gautam Saxena from Integrated Analysis Inc.) to be acknowledge in the manuscript.

Regards,  
Gautam

----- Forwarded message -----

**From:** H. Sophia Chung <[hchung26@jhmi.edu](mailto:hchung26@jhmi.edu)>  
**Date:** Sun, Aug 30, 2015 at 11:15 AM  
**Subject:** Could you please send an email to below address ASAP?  
**To:** "Viner, Rosa" <[rosa.viner@thermofisher.com](mailto:rosa.viner@thermofisher.com)>, "raghothama@jhmi.edu" <[raghothama@jhmi.edu](mailto:raghothama@jhmi.edu)>, Bob O'Meally <[romeally@jhmi.edu](mailto:romeally@jhmi.edu)>, Irina Tchernyshyov <[irinatcher@gmail.com](mailto:irinatcher@gmail.com)>, "Holewinski, Ronald" <[Ronald.Holewinski@cshs.org](mailto:Ronald.Holewinski@cshs.org)>, "gsaxena@i-a-inc.com" <[gsaxena@i-a-inc.com](mailto:gsaxena@i-a-inc.com)>  
**Cc:** "Van Eyk, Jennifer" <[Jennifer.VanEyk@cshs.org](mailto:Jennifer.VanEyk@cshs.org)>

Hello,

First of all, thanks for your help and comments for our project. Jenny and I submitted a manuscript to Journal, Circ.Res and we had liked to gratefully acknowledged you in our manuscript.

Now the manuscript is considered to be accepted once revisions are submitted by this **Monday, 31th**. With this, the journal requested to all acknowledged people to send an email for the permission (Please see below: the request by the editor). Thus, **could you please send an email to below address ASAP?** It's an open format. And for your interest, the manuscript and decision letter are attached.

Again, thanks for your help and it will be grateful if you can inform me (us) once sending an email to the Journal.

By editor: - All persons acknowledged by name in the manuscript must send an email to

[circulation.research@circresearch.com](mailto:circulation.research@circresearch.com) citing their permission to be acknowledged.

## Circulation Research

---

**From:** Viner, Rosa <rosa.viner@thermofisher.com>  
**Sent:** Sunday, August 30, 2015 2:39 PM  
**To:** circulation.research@circresearch.com  
**Subject:** CIRCRES/2015/307336D  
**Attachments:** FINAL\_Manuscript.pdf

Dear Editor

I give my permission to be acknowledged in the manuscript CIRCRES/2015/307336D by Chung et al: "Dual labeling biotin switch assay....( attached)

Regards

Rosa Viner

## Circulation Research

---

**From:** Irina Tchernyshyov <irinatcher@gmail.com>  
**Sent:** Sunday, August 30, 2015 12:56 PM  
**To:** circulation.research@circresearch.com  
**Subject:** CIRCRES/2015/307336D, asknowlegement permission

Dear Dr. Hajjar.

Here is to inform you of my permission to be acknowledged in the manuscript CIRCRES/2015/307336D, corresponding author Dr. Jennifer Van Eyk.

Sincerely,  
Irina Tchernyshyov.

## Circulation Research

---

**From:** Holewinski, Ronald <Ronald.Holewinski@cshs.org>  
**Sent:** Monday, August 31, 2015 10:40 AM  
**To:** circulation.research@circresearch.com  
**Subject:** Acknowledgement

Hello,

I grant permission to be acknowledged in the manuscript

**Dual labeling biotin switch assay to reduce bias derived from different cysteine subpopulations: A method to maximize S-nitrosylation detection**

Ronald Holewinski, Ph.D.  
Project Scientist, Heart Institute  
Advanced Clinical Biosystems Research Institute  
Cedar Sinai Medical Center  
8700 Beverly Blvd, AHSP A9229  
Los Angeles, CA 90048  
Phone: 424-315-2583

**IMPORTANT WARNING:** This message is intended for the use of the person or entity to which it is addressed and may contain information that is privileged and confidential, the disclosure of which is governed by applicable law. If the reader of this message is not the intended recipient, or the employee or agent responsible for delivering it to the intended recipient, you are hereby notified that any dissemination, distribution or copying of this information is strictly prohibited. Thank you for your cooperation.
